# Supplementary material
Source: publisher site journal article supplement (https://www.spandidos-publications.com/4425/downloadSupplementary)

Figure S1. Representative flow cytometry diagrams (dotplots) for Figs. 2 and 3. The percentage of CD133<sup>+</sup> cells vs. Stage 1, Stage 2, Stage 3 and Stage 4 is shown for Fig. 2. For Fig. 3, representative diagrams (dotplots) are shown for percentage of (A) CD133 positive, (B) CD166 positive and (C) Lgr5 positive cells vs. primary tumors and metastases, as well as (D) percentage of CD133 cells vs. lymphatic invasion (negative and positive). \*P<0.05 (Dunn's post hoc test).

Representative flow cytometry diagrams for Fig.2 and Fig.3

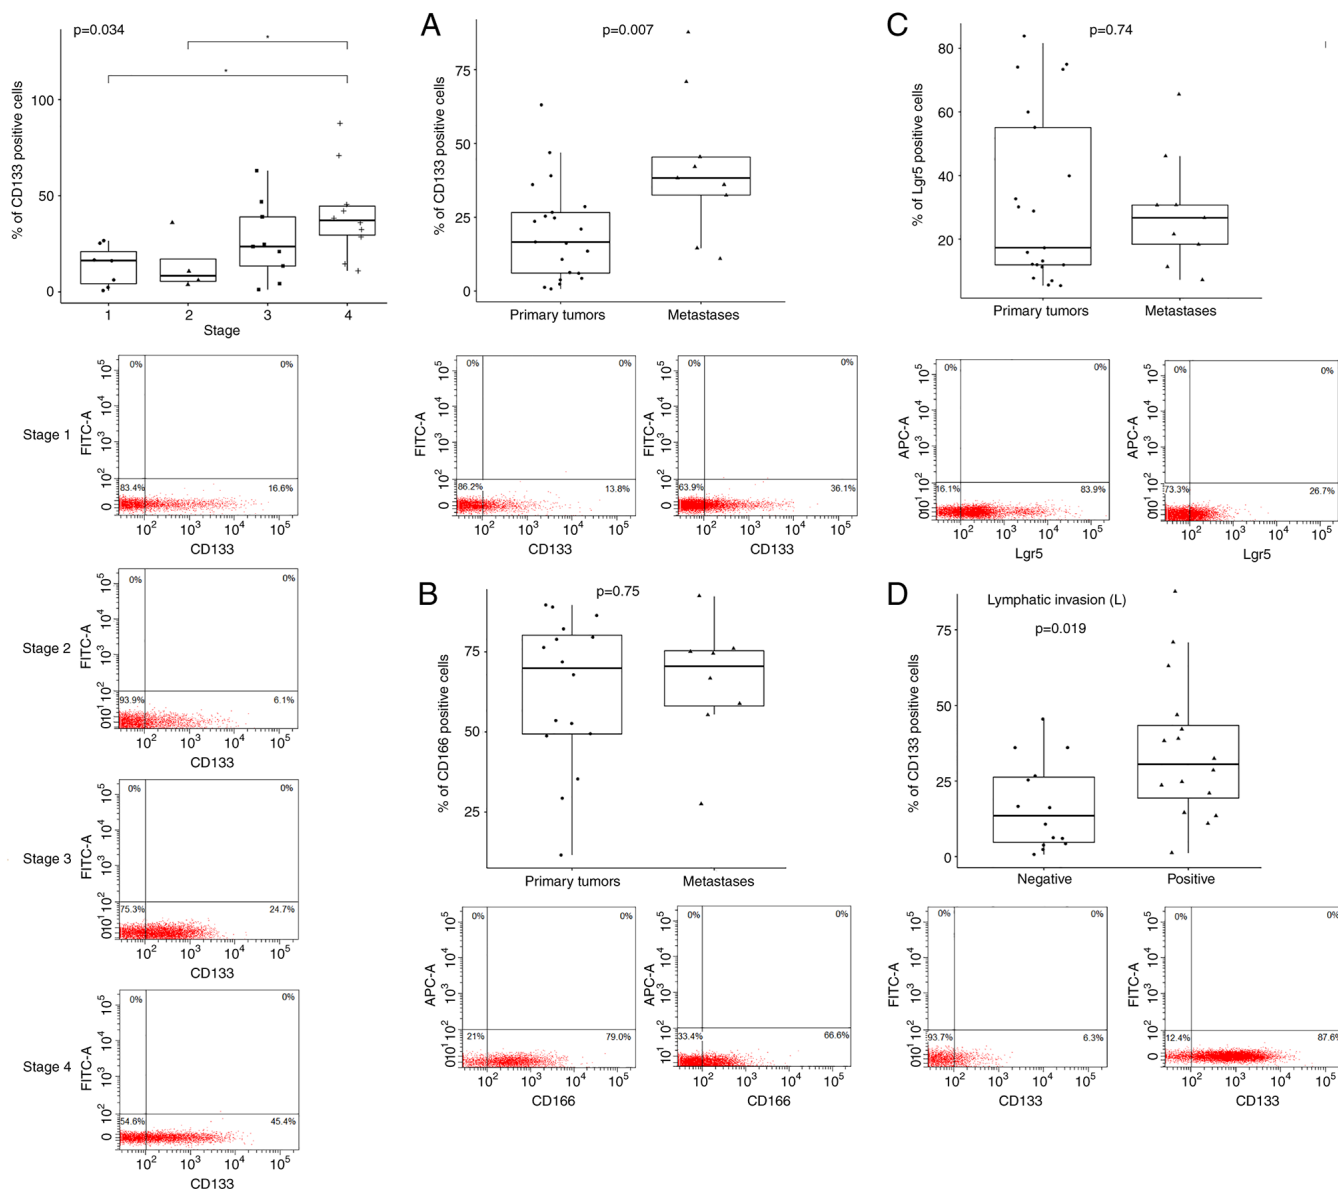

Figure S2. (A) ROC curve obtained by RF for discriminating between PT and MTS using the studied markers (without TNM staging). ROC is based on the OOB data. (B) Importance plot obtained by RF, using the VIMP (variance importance) measure. ROC, receiver operating characteristic curve; RF, random forest; PT, primary tumor; MTS, metastatic tumor.

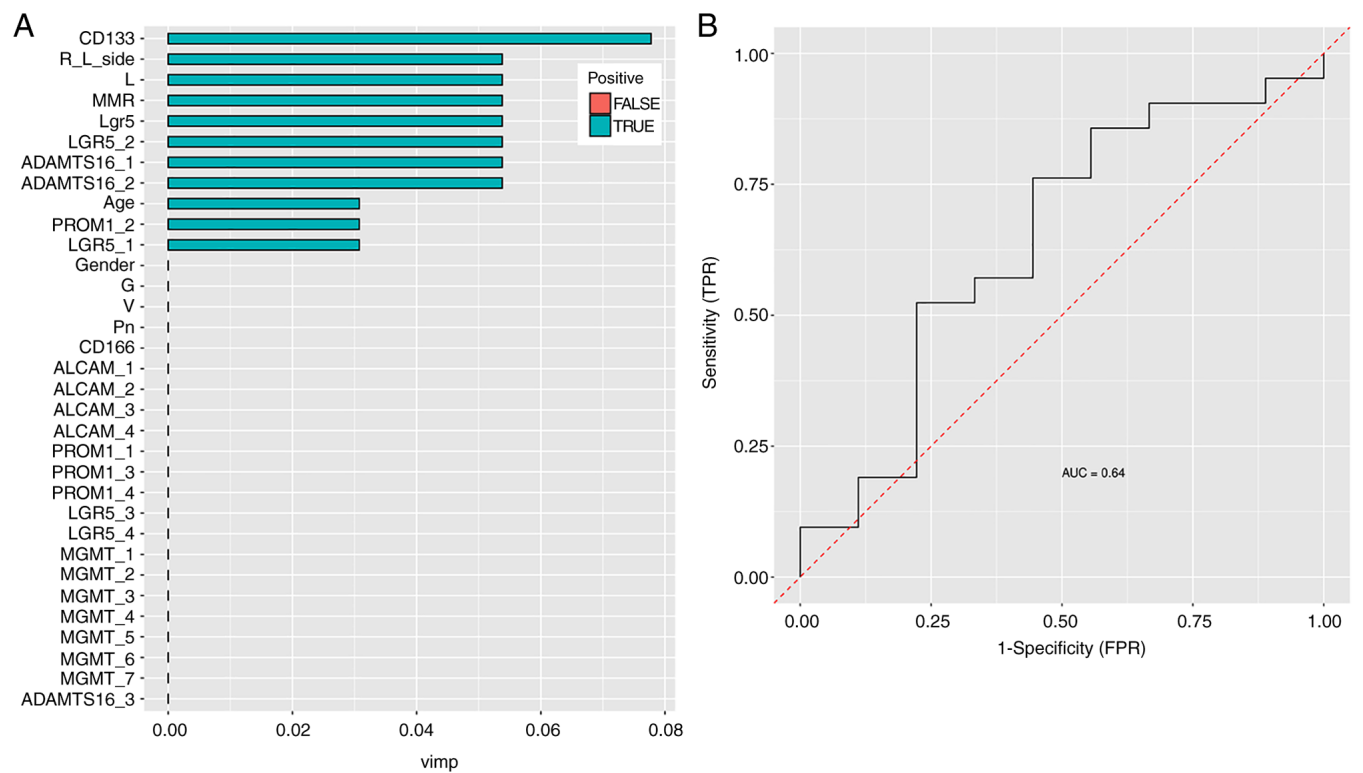

Supplement: Supplementary file 1 [file downloadSupplementary]
